# Supplementary material
Source: PubMed Central journal article supplement (PMC2475705)
Supplement: M708908200_1.pdf [file M708908200_1.pdf]

Suppl-Figure 1. Oh *et al.*

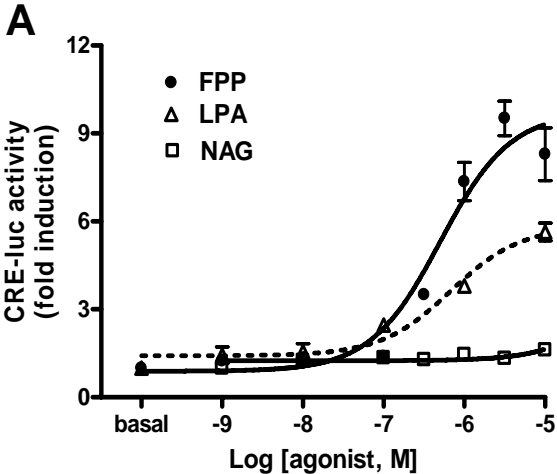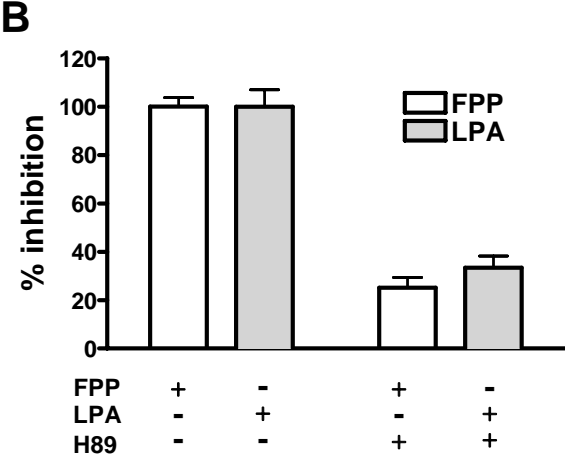

Suppl-Figure 2. Oh *et al.*

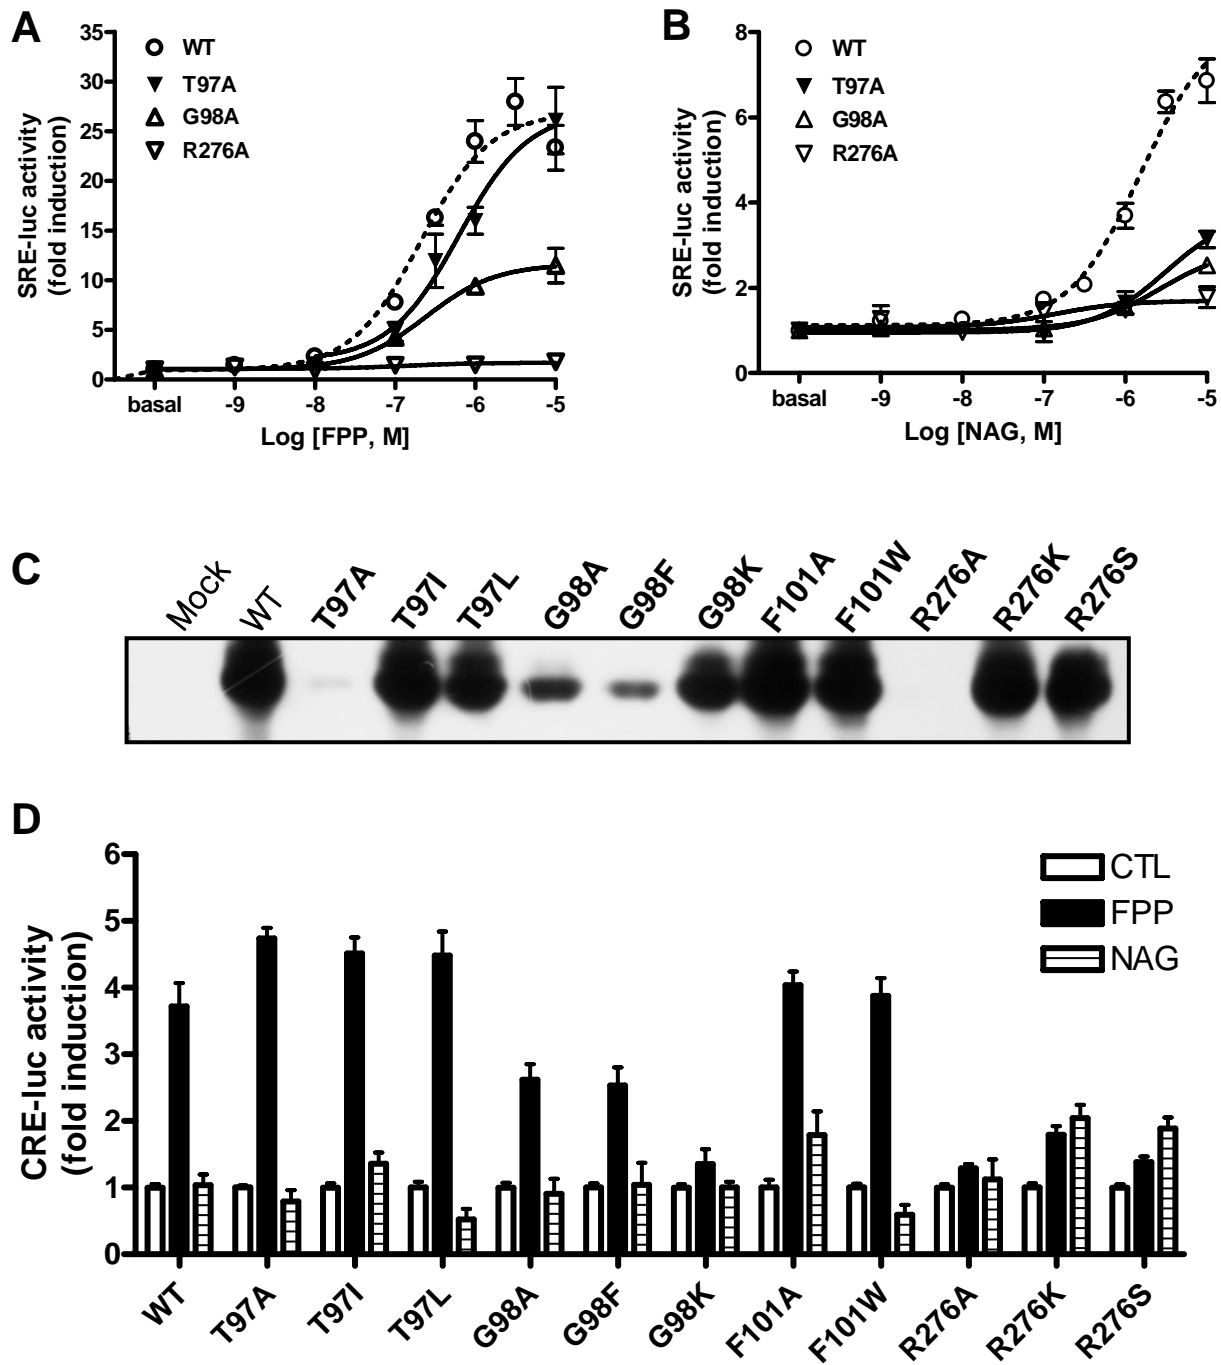

**A**

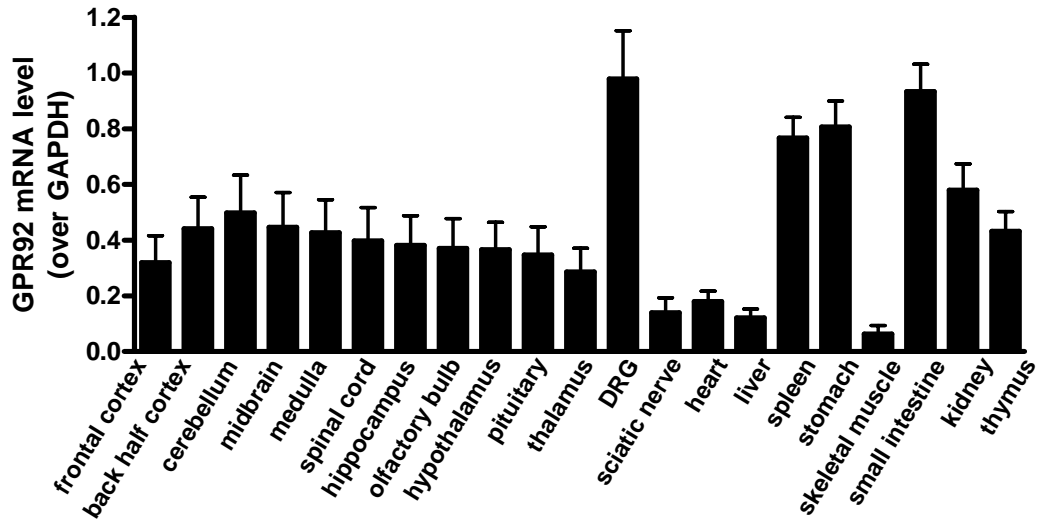

**B**

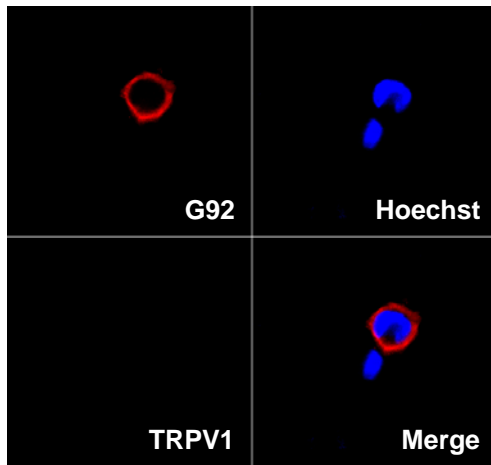

**C**

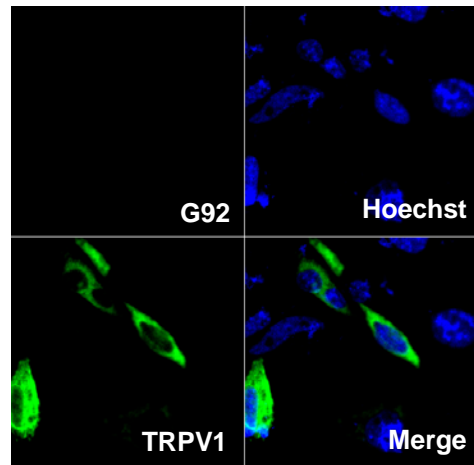

Suppl-Figure 4. Oh *et al.*

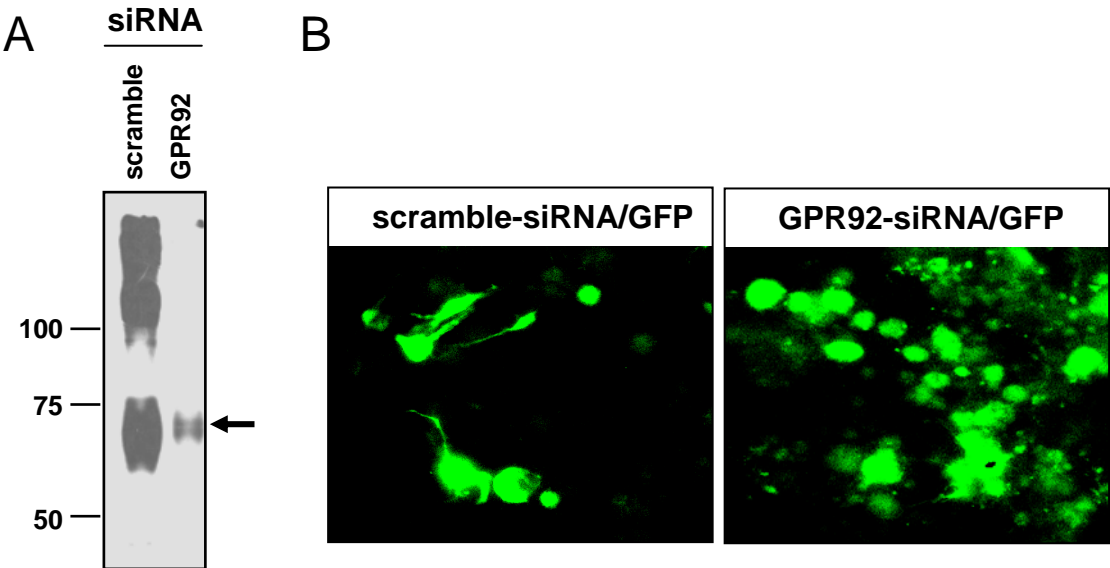

## Legends for Supplemental Figures

**S-Fig. 1. CRE-luc activity of cells expressing GPR92.** *A*, CV-1 cells were coinfecting with adenoviruses containing human GPR92 and CRE-luc in 96-well plates. Forty-eight hours after infection, cells were treated with the indicated concentration of FPP, NAG or LPA for 6 h. Cells were harvested and luciferase activity of the cell extracts was measured. *B*, The specificity of the signaling pathway was verified by pretreating with H89 (10  $\mu$ M), a protein kinase A inhibitor 15 min before the treatment of 10  $\mu$ M of FPP or LPA. Results are plotted as fold activity over basal activity. Each bar represents means  $\pm$  S.E. of three independent experiments performed in triplicate.

**S-Fig. 2. Dose-response activities of wild type and mutant GPR92s stimulated by FPP or NAG.** Wild type and mutant GPR92 were co-transfected with SRE-luc in CV-1 cells. Cells were then treated with the indicated concentrations of FPP or NAG for 6 h. Luciferase activity was measured and normalized against  $\beta$ -galactosidase activity. The results are plotted as fold activity over basal luciferase activity. SRE-luc activity of wild type and mutant receptors T97A, G98A, R276A in response to FPP (*A*) and NAG (*B*) are shown. Protein expression levels of wild type and mutant GPR92-GFP were determined by Western blot using an anti-GFP antibody (*C*). CRE-luc activity of cells expressing wild type and mutant GPR92s were determined in the presence of FPP (1  $\mu$ M) and NAG (10  $\mu$ M)

**S-Fig. 3. Tissue distribution of GPR92 mRNA and immunohistochemistry of GPR92 in mouse and human DRG.** *A*, Total RNA levels from 6-week old C57B/6 male mice in the indicated tissues were assessed by RT-PCR. GAPDH was used as a loading control. GPR92 mRNA levels over GAPDH mRNA are presented. Data represent means  $\pm$  S.E. of three independent experiments. *B and C*, For validation of the anti-GPR92 antibody and anti-TRPV1 antibody, an immunofluorescence assay was performed in HeLa cells expressing mouse GPR92 (*B*) and rat TRP V1 (*C*). Mouse GPR92 and rat TRP V1 were detected using anti-rabbit alexa594 and anti-guinea pig alexa488 secondary antibodies, respectively. No cross-reactivity between GPR92 and TRP V1 antibodies has been observed.

**S-Fig. 4. Knock-down of GPR92.** *A*, HeLa cells were transfected with GPR92-GFP in combination with scramble or GPR92 siRNA. Protein levels of GPR92-GFP were determined by Western blot using an anti-GFP antibody. The arrow indicates a GPR92-GFP signal. Signals with a molecular weight over 100 kDa likely represent dimeric or oligomeric forms of GPR92-GFP. *B & C*, Rat DRG cells were co-transfected with the GFP expression vector pEGFP-N1 and the scramble- or GPR92-siRNA, to monitor transfection efficiency (>80%).
